# Supplementary material for: A screening system to identify transcription factors that induce binding site-directed DNA demethylation
Source: PubMed Central journal article supplement (PMC5723091; doi:10.1186/s13072-017-0169-6), 2017-12-08

Figure S2

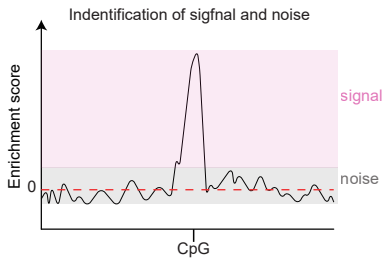

Fitting of the signal to Gaussian distribution

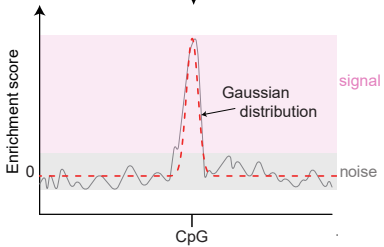

Supplement: 13072_2017_169_MOESM3_ESM.pdf [file 13072_2017_169_MOESM3_ESM.pdf]
